# Supplementary material for: Mitochondria-targeted anti-oxidant AntiOxCIN4 improved liver steatosis in Western diet-fed mice by preventing lipid accumulation due to upregulation of fatty acid oxidation, quality control mechanism and antioxidant defense systems
Source: PubMed Central journal article supplement — Redox Biol. 2022 Jul 16;55:102400. doi: 10.1016/j.redox.2022.102400 (PMC9304680; doi:10.1016/j.redox.2022.102400), 2022-07-16
Supplement: mmc2.pdf [file mmc2.pdf]

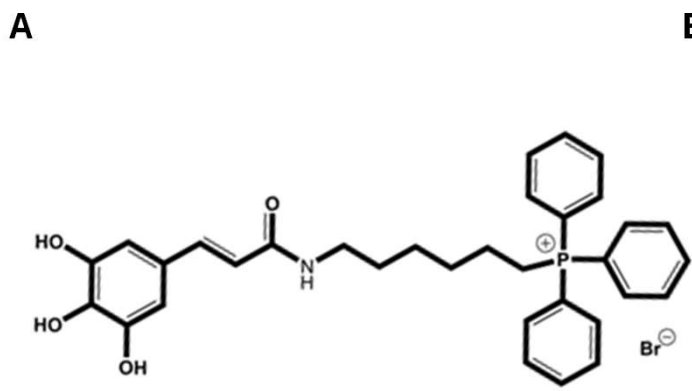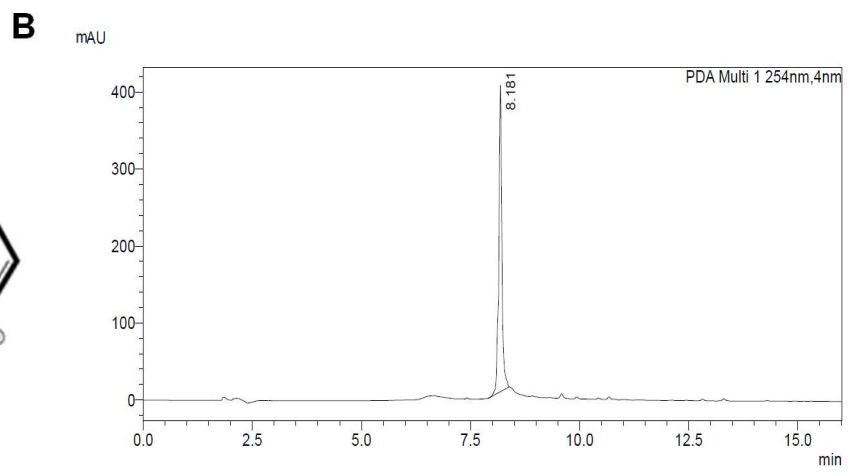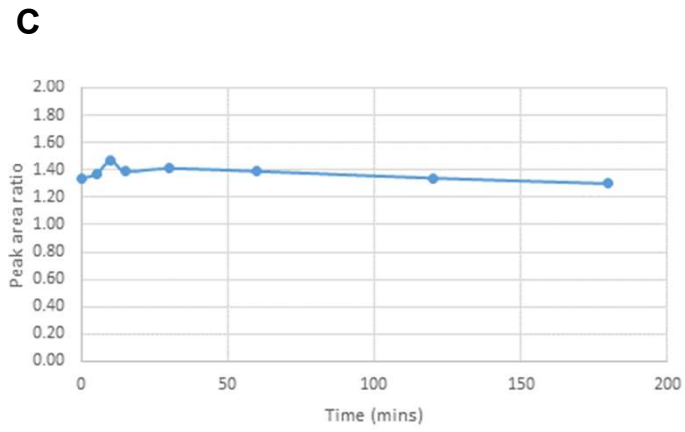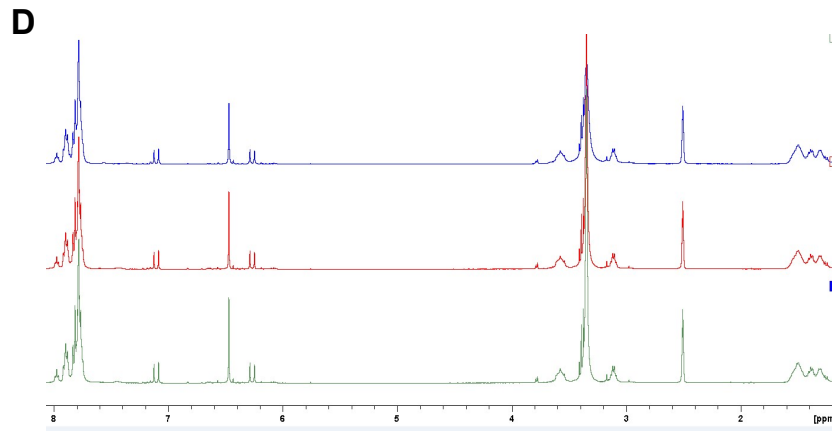

**Figure S1**

**A**

| Parameter (Units, g) | Vehicle + SD | AntiOxClN <sub>4</sub> + SD | Vehicle + WD    | AntiOxClN <sub>4</sub> + WD |
|----------------------|--------------|-----------------------------|-----------------|-----------------------------|
| Body weight initial  | 21.6 ± 0.9   | 24.0 ± 0.9**                | 20.6 ± 0.5      | 22.6 ± 0.8                  |
| Body weight final    | 29.9 ± 1.8   | 33.4 ± 1.0                  | 43.8 ± 1.4****  | 38.2 ± 3.6***; #            |
| Liver                | 1.18 ± 0.11  | 1.25 ± 0.05                 | 2.88 ± 0.03**** | 1.90 ± 0.37**; ###          |

**B**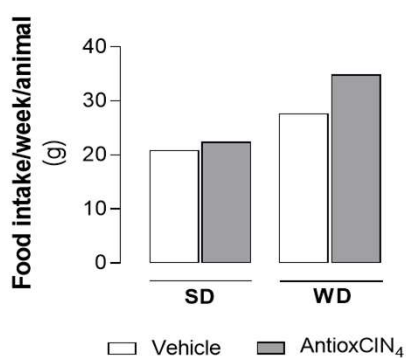**C**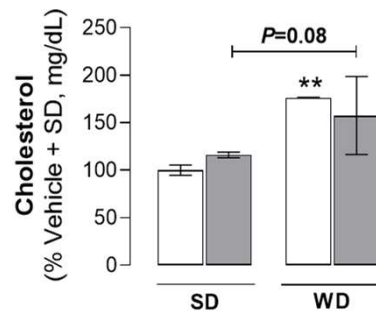**D**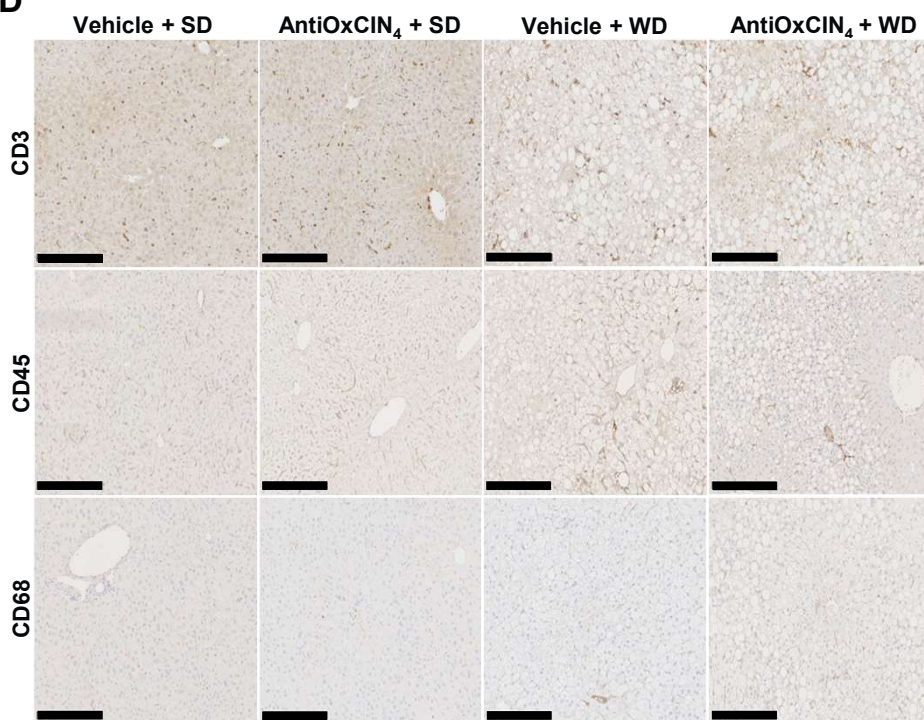**E**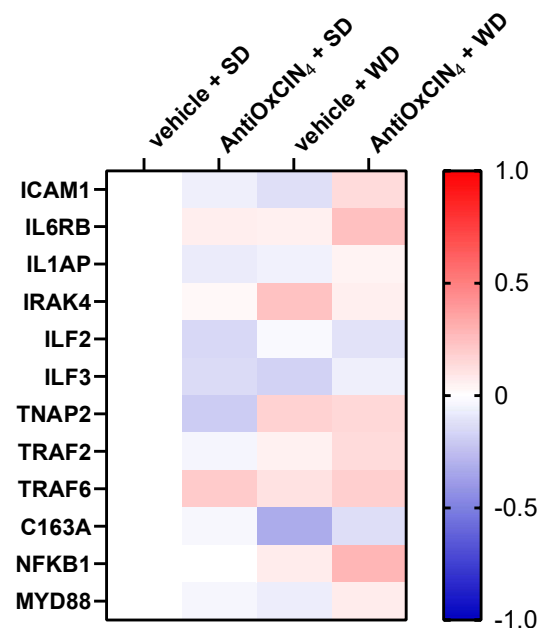**F***de novo* lipogenesis

elongation/ unsaturation

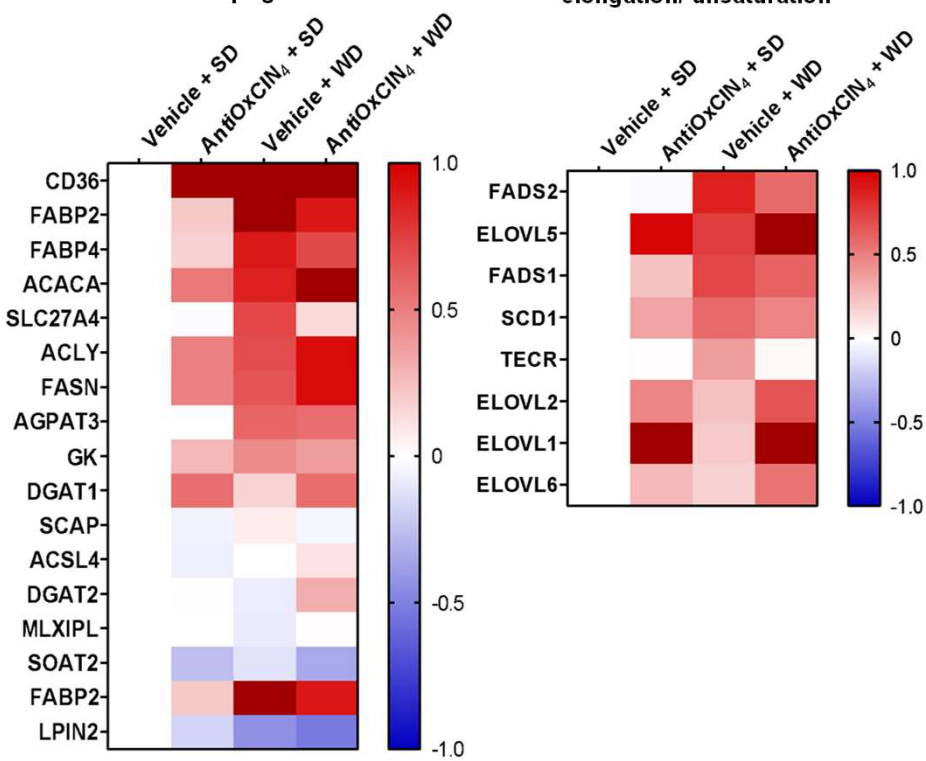**G**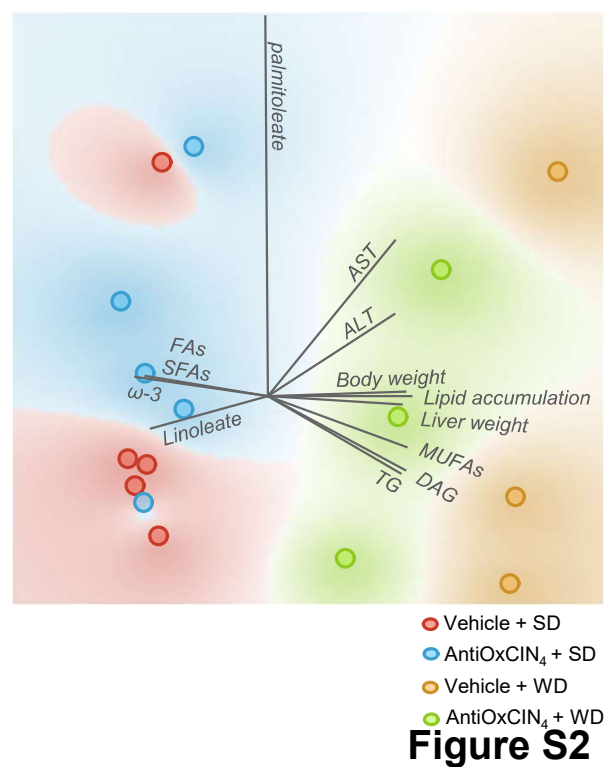**Figure S2**

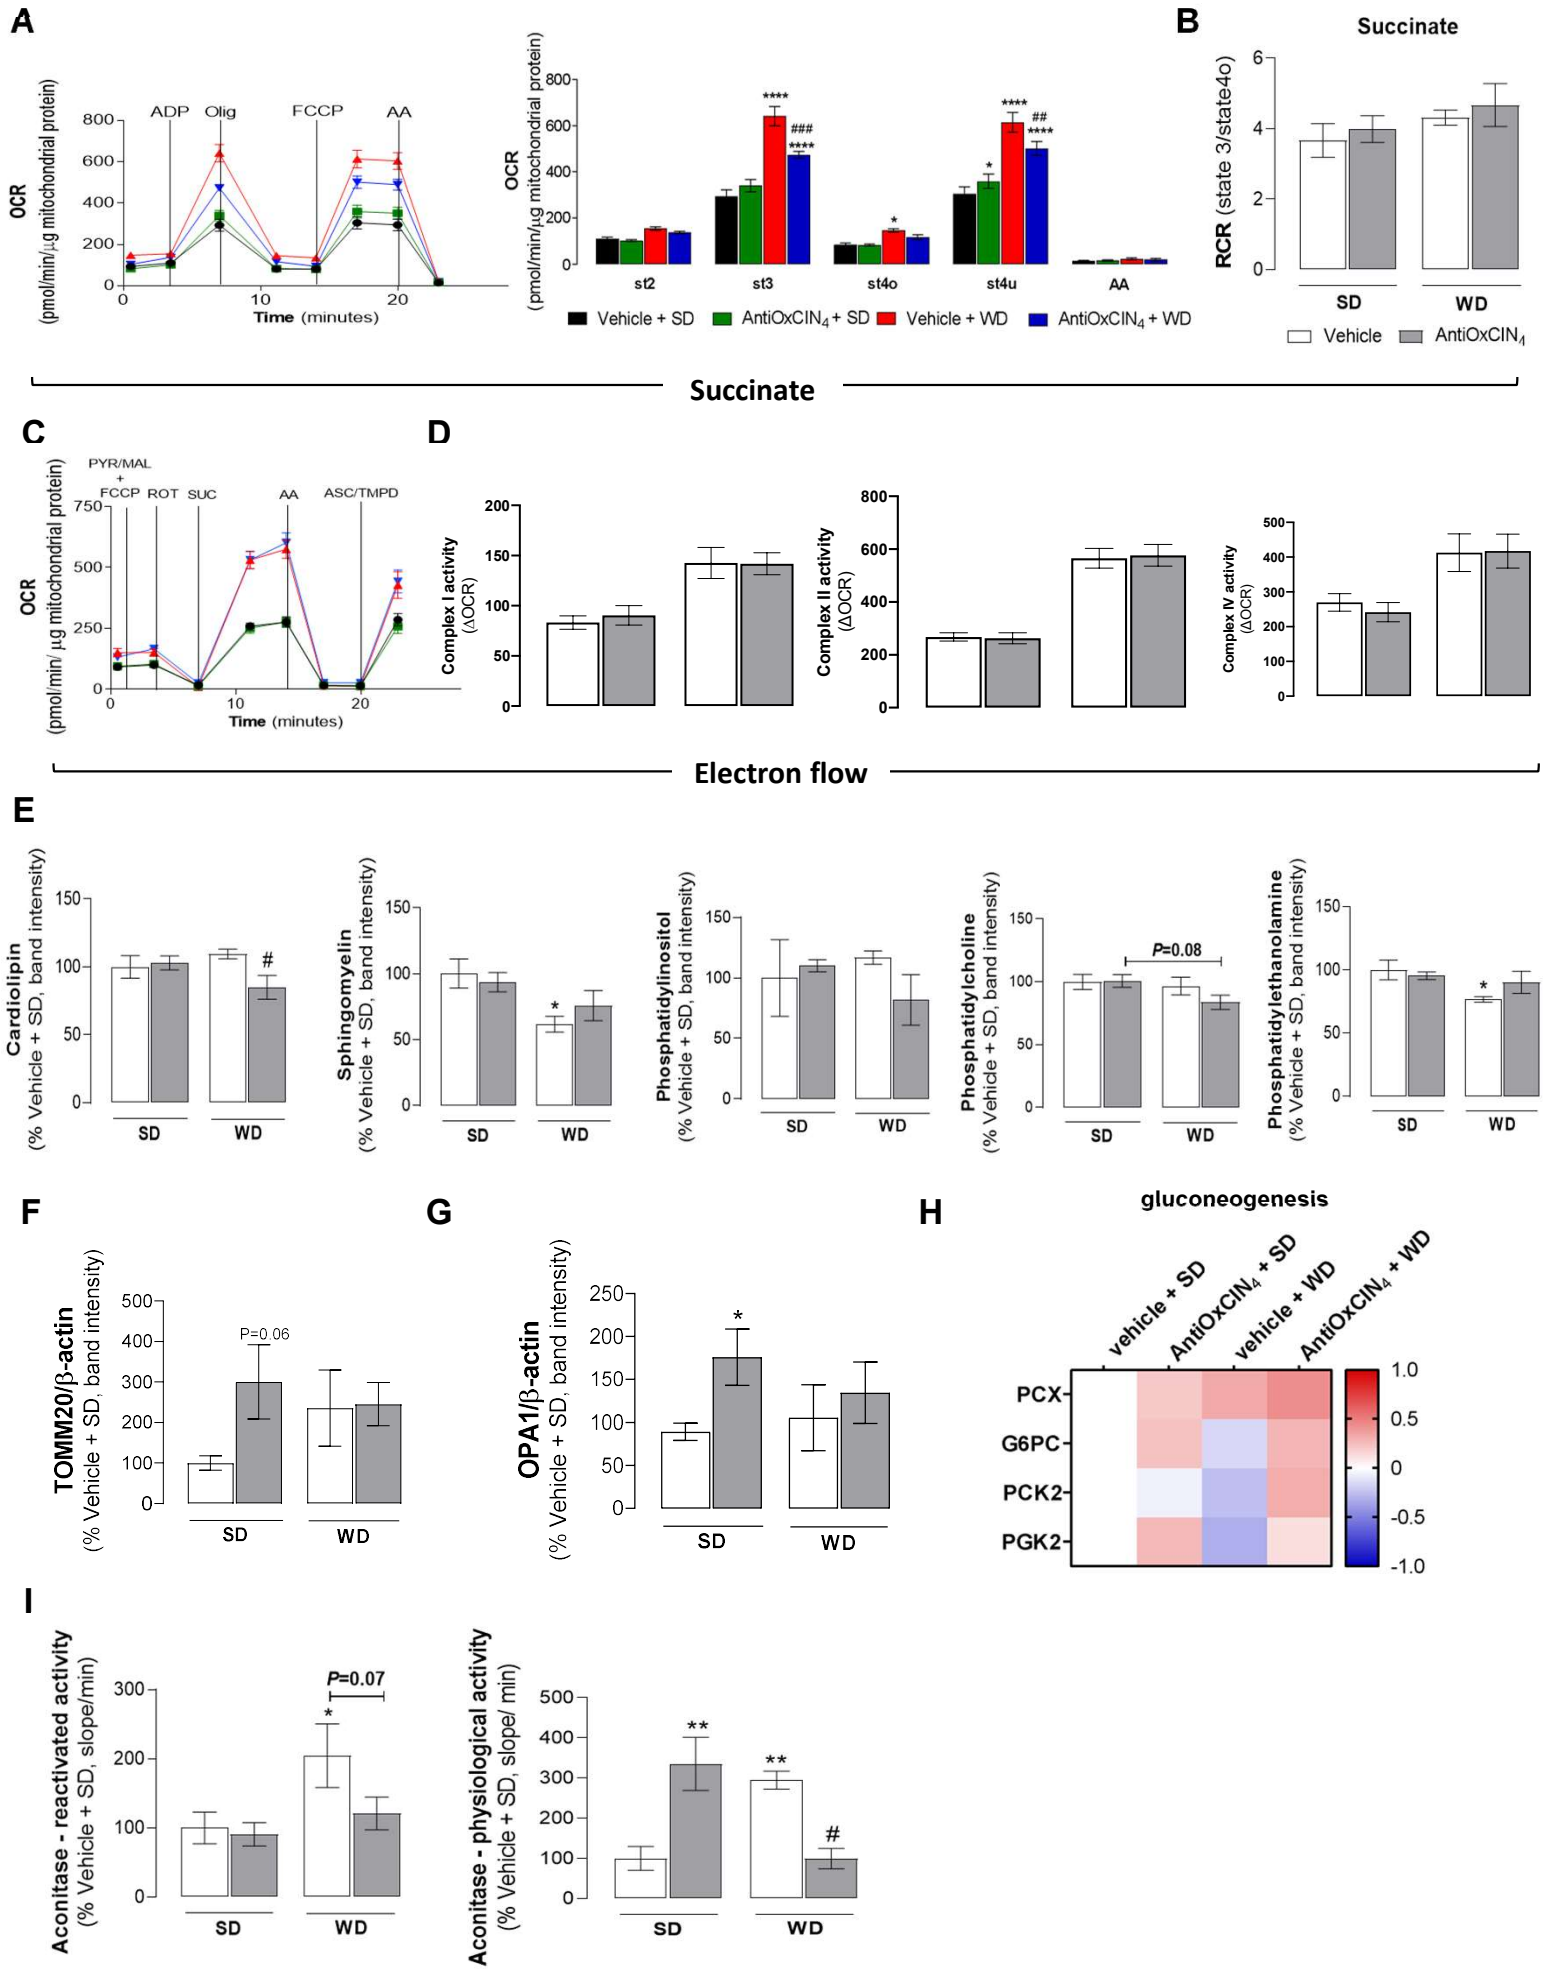

**Figure S3**

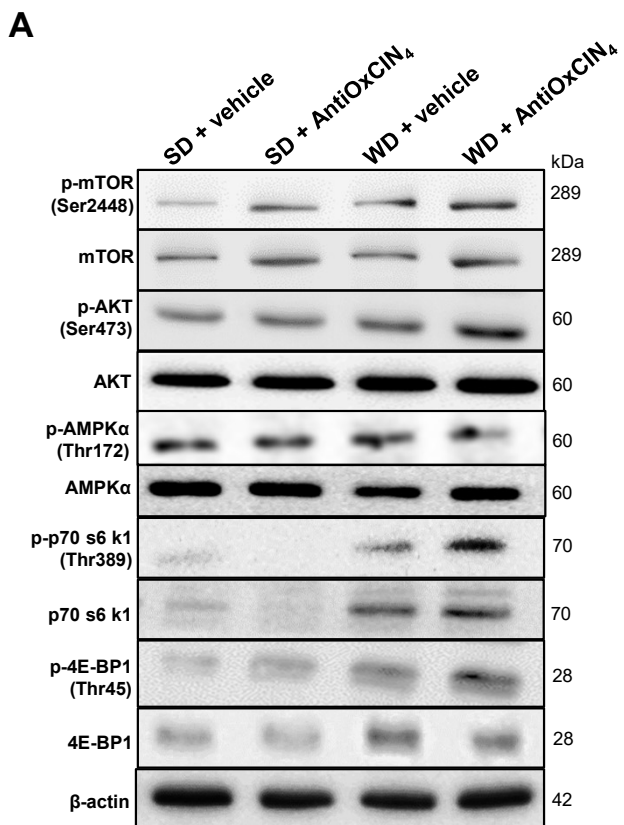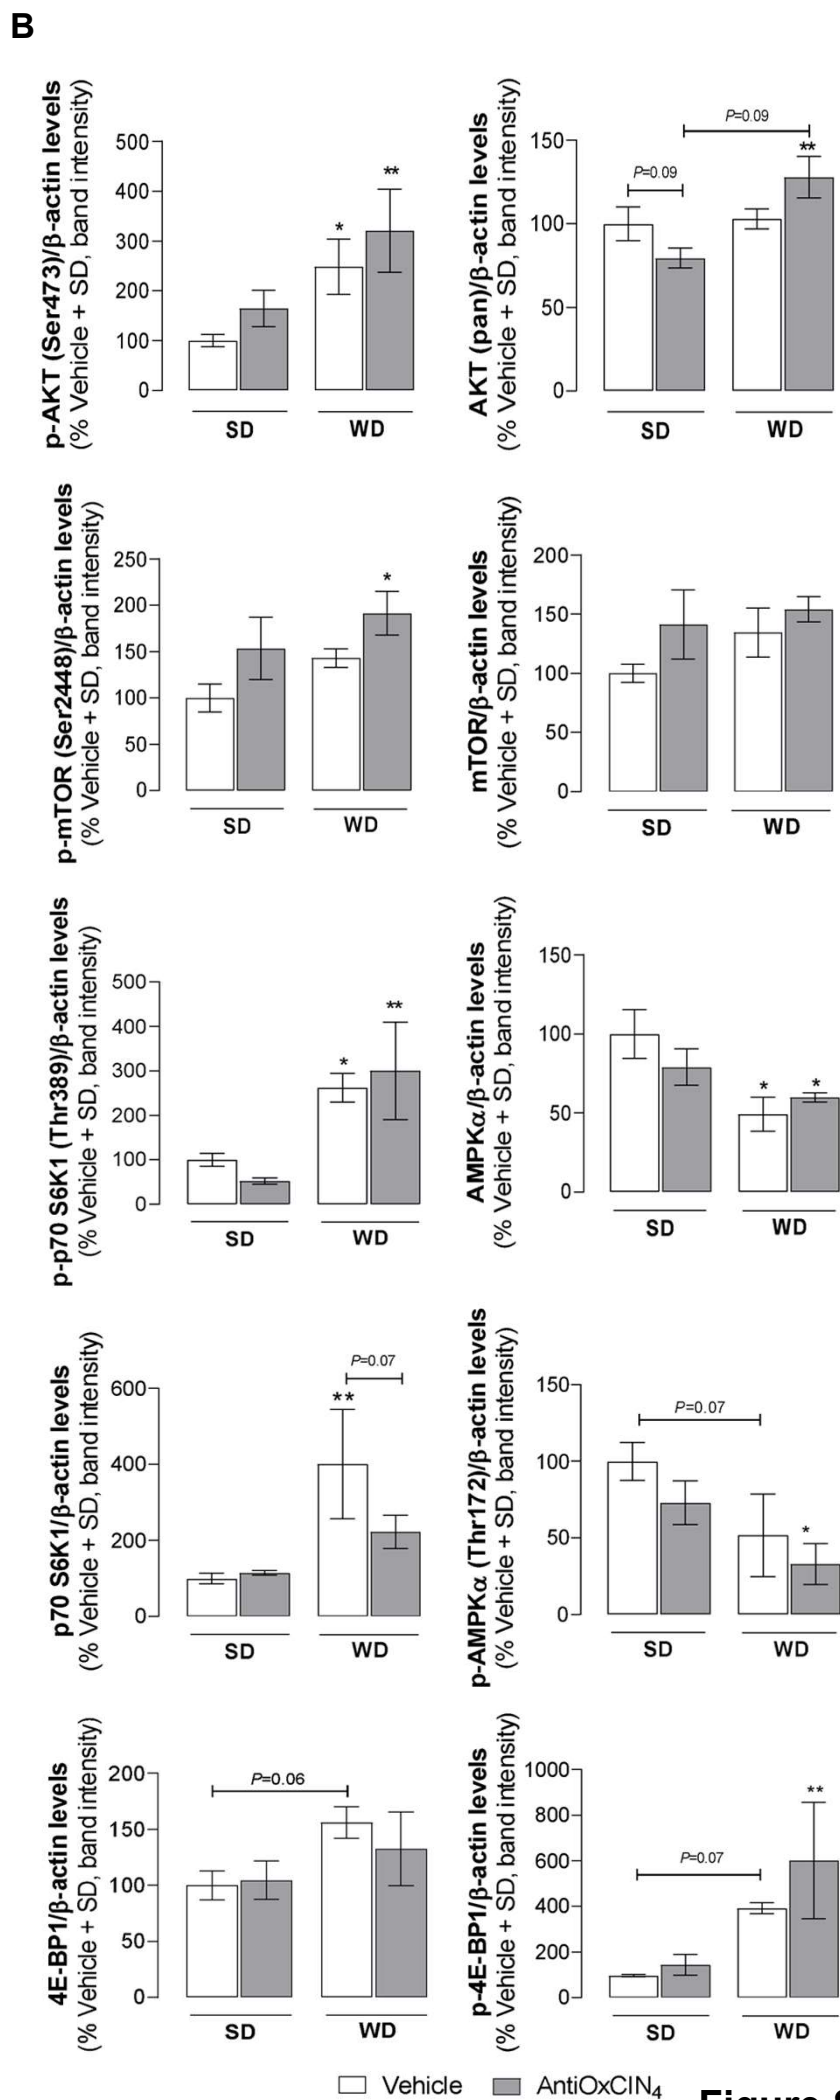

**Figure S4**
